# Supplementary material for: Cerebrovascular Senescence Is Associated With Tau Pathology in Alzheimer's Disease
Source: Front Neurol. 2020 Sep 16;11:575953. doi: 10.3389/fneur.2020.575953 (PMC7525127; doi:10.3389/fneur.2020.575953)
Supplement: Supplementary file 2 [file Table_1.XLSX]

## Sheet: Contents
Sheet	Description
Subject_Info	Subject demographic and pathological information.
Raw_qPCR_Cq	Raw RT-qPCR data for the 42 measured genes and 28 microvessel samples.
Gene_Functions	Genes and their corresponding hypothesis-driven functional groups.
BloodVessel_TotalCortex	Representative RT-qPCR data from blood vessel and total cortex for vascular enrichment analysis.
Olink_NPX_Data	Protein expression data in plasma, measured in NPX (Olink Proteomics unit)
Olink_Sample_Info	Specific information pertaining to each individual plasma sample per subject.
Olink_LOD	Olink manufacturer-specified limits of detection for each protein, measured in NPX.

## Sheet: Subject_Info
Sample ID	ABC-Amyloid	ABC-Braak	ABC-CERAD	ADNC Burden	Age at Death	APOE	Neuropathology Notes	Cerebrovascular Pathology
AD01	2	3	2	Intermediate	80-90	e2/e3
AD02	2	3	2	Intermediate	80-90	e3/e3
AD03	3	3	1	Intermediate	>90	e4/e3
AD04	2	3	2	Intermediate	80-90	e3/e3		CVD, INF
AD05	2	3	2	Intermediate	80-90	e3/e3
AD06	2	3	2	Intermediate	80-90	e3/e3
AD07	3	3	3	High	70-80	e4/e4
AD08	3	3	3	High	60-70	e4/e3
AD09	3	3	2	High	>90	e4/e3		CVD, CAA
AD10	3	3	2	High	80-90	e4/e3	Hippocampal Sclerosis
AD11	3	3	3	High	80-90	e4/e4
AD12	3	3	3	High	70-80	e4/e3		CVD
AD13	3	3	3	High	80-90	e4/e3
AD14	3	3	2	High	80-90	e4/e3		CVD, CAA
AD15	3	3	3	High	60-70	e4/e3		CAA
AD16	3	3	2	High	>90	e2/e3		CVD, CAA
CTRL01	0	0	0	Not AD	50-60	e3/e3
CTRL02	0	0	0	Not AD	>90	e3/e3	PSP
CTRL03	0	1	0	Not AD	80-90	e3/e3
CTRL04	0	1	1	Not AD	>90	e2/e3
CTRL05	0	1	1	Not AD	>90	e3/e3		CVD
CTRL06	0	1	0	Not AD	>90	e3/e3		CVD, INF
CTRL07	0	1	0	Not AD	>90	e3/e3
CTRL08	0	1	0	Not AD	70-80	e3/e3
CTRL09	0	1	0	Not AD	>90	e3/e3		INF
CTRL10	2	1	1	Low	>90	e3/e3		CVD
CTRL11	1	1	1	Low	70-80	e3/e3		CAA
CTRL12	1	1	0	Low	>90	e3/e3	LBD, PART	CVD, Arteriolosclerosis

## Sheet: Raw_qPCR_Cq
Sample ID	VWF	SLC2A1	TIE1	TEK	PECAM	Nostrin	NOS3	HMOX1	SERPINE1	CDKN1A	CDKN2A	CDH5	CXCL1	CXCL2	IL6	CXCL8	CSF2	VCAM1	ICAM1	ICAM2	MADCAM1	EMCN	TJP1	CLDN5	OCLN	ESAM	SELP	SELE	APOE	LRP1	Plau	PLAT	VEGFA	KDR	FLT1	ENG	ADGRL4	DLL4	GJA1	ACTA2	ALDH1L1	ITGAM	GAPDH	PGK1	ActB	RTC	PPC	HGDC
AD01	28.203	28.6163	30.5954	32.366	30.4943	31.5257	30.4982	35.0601		28.8317		30.9251	34.4825	32.8332	32.1706	34.2875	38.2444	34.9751	33.3019	29.4719	37.5905	31.1308	30.4282	27.3312	31.5633	31.0515	38.8504	36.2927	32.879	30.2976	35.4676	33.1262	32.2137	33.2461	28.0366	29.2102	31.1718	30.6661	31.0838	29.7929	34.4002	35.334	28.6765	30.0912	27.2818	22.1942	20.9632	38.939
AD02	26.7202	28.0941	29.3269	30.3527	30.6097	29.1795	30.1093	33.8879	33.029	27.5826	38.456	29.638	30.0654	29.1766	30.8593	32.9857	38.5472	30.6099	29.8109	28.023	36.1051	29.1887	28.0948	26.7974	29.6004	30.0788	39.2647	30.087	30.4946	29.7854	33.4414	31.3431	31.0048	31.4423	26.3656	28.2636	29.4223	30.1787	28.5709	30.258	33.1437	34.836	27.2446	28.527	26.5482	21.6083	20.2068
AD03	28.3282	29.2129	30.8917	32.44	31.6206	31.4142	31.3952	35.6056	36.0535	30.1738		31.3039	34.3472	31.2898	35.0248	34.1007	38.0745	35.6803	36.1662	29.7811	37.14	32.1626	30.2639	27.7951	32.9593	32.123	39.6744	38.0924	32.9262	31.2141	37.4616	33.3251	31.5511	33.5775	28.8797	29.4542	32.216	31.4964	32.4516	31.1303	34.3823	34.708	28.5022	30.1737	27.6191	22.0313	20.767	37.4418
AD04	28.3997	30.406	31.0307	32.4639	32.7014	32.0448	31.558	34.1995	33.6218	29.259		31.3577	32.2771	31.4988	34.1541	34.2924	39.2377	31.9185	32.3852	30.0379		31.2949	30.1151	27.8275	32.3217	31.7901		32.2846	31.8042	31.1601	35.4328	32.6581	31.8826	33.9984	28.6561	30.4156	31.7696	31.2857	30.8824	32.145	33.5367	35.4291	28.5742	30.1796	28.1956	21.6608	20.29	37.553
AD05	29.8362	30.6016	31.8868	34.2158	34.7525	33.0422	32.375	35.265	35.0783	32.1301		33.2793	36.2208	34.0322		37.2937		36.6675	34.3271	31.289		33.2414	31.4585	29.5098	33.3909	32.6678			32.4334	32.3229	36.4205	34.2085	33.1842	35.0623	30.2589	30.662	33.5935	32.3928	32.2704	31.9945	34.7018	36.2104	30.0431	31.6602	29.276	21.2198	20.2102
AD06	26.3916	26.6845	28.6452	30.0843	29.0328	30.2968	28.7843	34.0326	30.4781	27.655	36.4847	28.6537	29.6454	29.0772	32.2483	31.3433	36.1261	32.5965	30.4423	26.8978	34.4616	30.1529	29.0039	25.1081	29.8563	28.9139	38.2723	34.257	32.0149	29.9004	34.1382	31.2578	30.0853	31.6295	26.4743	27.2135	29.134	28.9672	29.4233	30.5138	35.1303	34.6038	26.1844	27.4645	25.1608	22.0253	21.0945	39.3574
AD07	28.4018	28.5147	30.6675	32.7136	34.1738	31.1909	31.5139	36.1406	36.7048	30.6146		31.1052	34.1005	32.4237	37.3393	33.7286	35.8225	37.7027	34.3427	29.1476	35.9379	31.8669	30.2945	28.1092	31.6397	31.9301		37.1456	36.0087	30.9619	36.2415	35.5243	34.0923	33.3379	28.5555	30.4743	32.0656	31.9596	32.1925	32.1708	37.8958	36.3546	29.7737	31.3629	28.3128	23.7195	21.7253
AD08	26.96	26.58	28.2737	29.4457	28.2343	29.8238	28.2182	33.447	32.197	26.597	36.4783	28.4234	29.8826	28.5176	31.2342	31.0683	34.28	32.0556	29.4706	26.8989	34.8282	29.115	28.1564	25.066	29.6392	28.4876		30.2781	30.8733	28.7654	33.4946	30.3557	30.4526	31.3959	25.9868	27.6293	29.5315	28.062	28.5006	27.9818	33.017	33.1616	26.9665	28.1819	24.6174	21.829	20.6598
AD09	28.4917	29.4408	30.603	32.8052	33.3642	32.0446	31.3516	37.5697		32.8292		32.7653	38.5136	35.9123	37.1476	35.4938	37.1431	37.8257	36.5098	31.2081	31.3625	33.4233	31.7579	29.9668	31.9149	33.278		39.1177	38.0396	32.0745	36.5597	36.2809	34.0776	35.1496	30.1031	30.508	33.2433	32.9051	35.0668	31.5116	36.7053	35.6699	30.6212	32.9569	29.2893	23.4086	21.7013
AD10	29.5832	32.8348	31.741	36.1937	35.2817	34.8183	32.5899	37.7482	36.9106	29.6209		34.1846	32.1092	30.6151	32.0857	32.3852	39.622	34.2598	31.6765	31.1724	38.1735	34.3725	32.7648	30.1981	34.1249	33.2615	39.3299	33.5045	38.7613	33.0374	36.4441	35.9347	32.4861	35.5737	30.3622	31.8052	32.276	33.5807	32.9089	34.2935	39.8237	37.4694	30.8297	31.7478	30.1279	23.4173	21.8304	38.1485
AD11	29.0102	30.5685	31.4763	32.8845	32.3839	31.8116	32.8806	36.7844	35.7679	31.0566		32.6168	35.0334	32.8327	35.5742	32.4763	37.8218	36.5679	33.4363	30.8523	37.2219	33.1982	31.6464	28.7326	33.6982	33.0286	38.0783	36.1977	37.104	32.1155	37.1461	36.807	35.4463	34.5692	30.4502	30.0013	32.6689	33.0492	33.021	33.1315	35.74	36.2571	31.0269	32.5722	30.0927	23.8684	21.812
AD12	30.2531	30.717	31.5775	35.5032	34.8761	33.8074	32.7959	36.6857		31.7381		33.8262	37.2823	36.914		36.9627	36.4869	37.3586	35.917	32.0431		33.354	34.0621	29.4657	32.9628	34.4825			38.1212	33.1829	38.464	36.3761	34.2611	35.5283	31.1389	31.9512	33.8576	32.4911	37.799	31.9642	35.7504		31.029	32.4973	30.0861	21.8437	20.6597
AD13	28.8266	30.4602	30.5791	34.21	33.2805	32.6581	32.2373	35.8572	34.5011	30.4689		33.1188	36.6675	34.4069	38.2889	34.953	36.0274	37.1445	34.5267	30.2384	36.7067	32.7845	32.0818	28.6311	31.2012	32.5905		36.9028	36.2236	31.3376	37.0935	36.3409	33.5443	33.1671	29.984	30.8405	33.0198	32.2401	32.0409	33.0821	37.4909	35.7798	30.2548	31.5375	29.4485	23.1342	21.7275
AD14	28.1542	28.6617	30.4659	31.9385	32.2966	30.9641	31.4775	35.3348	35.591	31.0445	37.2483	31.9899	35.0303	33.1157	37.0586	34.6559	37.8165	37.1163	34.4379	29.6975	32.6842	30.9649	30.3297	28.2351	32.1004	31.5537	36.9125	36.5966	36.4603	30.0065	35.6783	35.7037	32.274	33.4491	28.6146	29.857	31.5389	31.8096	31.8938	31.6639	34.5384	35.3546	28.984	30.8287	28.0068	23.2043	21.175
AD15	29.7823	30.6938	30.9979	34.8685	33.5136	32.4012	31.1896	35.895	36.7411	30.7153		32.5915	35.2395	34.1772	36.1996	34.8992	36.3846		34.0749	31.009	39.0011	33.7657	31.2934	29.4824	32.175	33.1603		36.6039	36.8525	31.1844	35.9628	37.2521	33.4037	35.0126	30.4159	31.1019	34.4929	33.0091	33.477	34.465	35.4589	36.6118	30.3947	33.6091	29.9476	23.4459	21.6386
AD16	27.1616	27.98	30.0182	31.1848	31.7791	30.4428	30.6136	36.5148	33.6719	30.7965	37.5601	31.1814	34.2307	32.0484	33.4585	35.2585	36.0243		33.0674	28.9851	31.0653	31.1814	30.5231	28.2158	30.683	32.1863		35.2021	37.006	31.0702	35.5935	35.0979	33.4176	34.044	28.2533	29.1285	31.2016	32.0439	32.487	31.9388	36.7822	35.7561	29.0296	30.2703	27.6008	22.9403	21.5397
CTRL01	26.5944	27.2721	29.857	31.6773	29.6991	30.5294	29.448	33.1407		26.3976		29.4471	33.0662	31.6945	29.9182	34.8762	36.3088	33.9855	31.4871	28.5714	34.6553	29.1504	29.6729	26.1807	31.0563	30.0191	38.6024	31.2515	30.5649	29.9279	34.0474	30.8797	29.6582	32.6549	26.899	28.0857	30.0009	30.1618	29.8697	31.2005	33.2478	33.7414	26.5093	28.5125	27.1465	21.4907	20.3451	35.6631
CTRL02	28.1833	28.4606	31.0451	32.713	33.0811	31.8056	30.0891	34.994	34.6353	30.0126		31.1154	35.3831	33.2548	32.8027	34.4357	37.1849	35.9252	33.1383	29.0518	37.7094	31.552	30.3605	27.7537	31.0688	32.0137	37.7536	35.0191	36.7731	31.0509	35.0476	35.4959	30.455	35.752	28.2211	29.4842	32.0867	31.4151	31.7032	32.148	37.7124	34.3963	29.109	30.1858	28.0401	23.2935	21.4038
CTRL03	28.0366	29.6528	30.8416	31.983	30.3927	32.0587	31.0186	35.1389	36.1086	30.2819	36.7843	31.0443	36.0367	32.0981	33.4945	35.391	39.4823	32.5729	32.481	29.8073		31.185	29.2903	27.8544	31.0927	31.7573		35.4524	31.8276	30.8898	36.0231	32.6102	31.0483	33.3628	28.6836	30.0569	31.7218	31.1379	31.5355	29.9996	35.9341	34.6384	28.7012	30.834	28.006	22.2634	20.989
CTRL04	26.1721	26.5042	29.0005	30.1606	28.9963	28.7719	30.0318		33.174	29.1579		30.1013	30.3508	29.0741	33.4516	31.9227	36.8737	32.9252	32.8447	28.1674	35.3859	29.6184	28.264	26.1134	29.666	29.8981	37.621	38.1973	31.9021	29.2594	34.8897	31.0231	31.5955	30.5497	27.1798	27.4773	29.4787	30.4747	30.1305	28.1954	35.4849	35.6827	27.2197	28.6469	25.7665	21.4257	20.1526
CTRL05	29.0039	30.046	31.1742	33.7743	31.202	31.3522	30.9445	36.076	35.459	30.5534	36.5678	31.608	34.7747	32.7126	35.1418	36.6787	38.4438	32.889	32.909	30.6403	38.7068	32.4972	31.0007	28.1089	31.7645	31.8354		32.3112	31.1157	31.5342	34.0986	32.9922	32.5492	33.4807	28.6401	28.1327	31.3956	32.0253	31.4646	29.008	35.5307	33.9479	27.8207	29.6526	26.8689	21.0564	20.3495
CTRL06	28.3489	29.1023	31.2147	33.1905	33.6856	32.4429	32.1705	36.0144	37.5967	31.4103		32.0162	36.6132	34.0032	35.1796	34.7046	36.634	35.2149	34.2206	30.6833	36.6748	32.4179	31.019	28.9461	32.0009	33.1242	37.9901	37.0271	36.1014	31.1415	35.7105	35.3847	32.782	33.7049	29.4049	30.1422	32.9697	32.6269	33.9424	31.2625	37.4049	35.1218	30.3013	32.2081	29.0664	23.6176	21.6492	37.6563
CTRL07	27.8202	28.6035	30.1763	32.0219	31.2121	31.5821	31.4434	35.9073	35.0187	29.963		30.5505	35.1138	33.2514	36.0037	34.4134	35.8851	34.1628	33.9169	28.6511		31.1942	29.2543	26.3226	30.4751	30.5536		35.5136	31.2763	29.7113	34.3501	32.466	30.8023	31.4963	26.6392	27.1275	29.0707	28.6636	29.0546	29.6164	33.0514	33.5173	26.2156	27.5119	25.2042	21.1133	20.7116
CTRL08	27.3073	28.4714	29.3951	31.401	30.1235	31.9753	30.3111	32.9502	33.1857	29.2346	36.4147	30.0375	32.6818	32.725	38.0741	34.4932	37.0687	35.4977	32.3677	28.172	34.6861	29.8614	30.2354	26.5739	30.5491	29.6514		36.2103	29.6685	29.6706	34.7237	32.6336	31.9526	31.8731	28.3585	28.5722	30.5174	30.1223	29.4062	28.6661	32.1309	34.4773	27.2403	28.7866	25.987	21.4439	20.4993
CTRL09	28.3741	29.0981	31.0088	34.057	33.4623	32.698	31.0952	35.6274	34.0271	30.0842		31.9467	36.5791	33.5446	34.1228	34.5483	37.7375	37.7254	35.0605	30.644	37.9026	32.8456	31.6072	28.0376	32.9543	32.9322		36.34	37.0703	31.9569	35.7197	36.5436	31.5529	35.4351	29.0254	30.8024	32.3358	32.0702	32.6739	32.5695	36.0143	35.7014	29.433	31.022	28.4193	23.8835	21.8273
CTRL10	27.0961	28.0564	29.8052	31.1139	30.8337	30.9914	30.5852	34.5365	35.3724	29.4139		29.8821	32.0054	32.1108	33.117	36.3318	38.6189	31.9835	32.2756	28.8722	34.6347	29.5172	28.6442	27.1129	30.3703	29.9689		38.2718	29.5835	29.7187	33.5686	31.6803	31.0392	32.3269	27.4414	28.0576	30.0514	30.3319	30.3053	30.3739	34.8123	35.6578	27.5391	29.0412	27.0289	21.4201	20.2418
CTRL11	27.4126	27.2354	29.1796	29.7447	29.5127	30.1173	30.3539	34.7487	34.2555	31.2795	36.0815	29.6117	34.7541	33.5501	36.4035	34.3736	37.6592	32.0928	31.8019	28.4584	36.0559	29.3168	28.0568	26.5327	29.9134	29.2863	39.3069	38.2672	29.0392	29.83	35.6914	31.1746	33.0777	31.7933	28.0442	27.7775	30.8359	30.0611	31.1152	28.1011	33.4013	34.8653	27.9103	29.5421	25.4046	21.5619	20.268
CTRL12	28.9317	28.2308	29.9415	31.6812	34.1673	31.1513	31.0351	35.5178	37.044	30.5228		31.5028	35.5737	33.7961	33.7354	34.5093	36.8996	37.1719	34.0735	29.3784	39.7429	32.0269	30.2947	28.2395	31.4808	32.1585		39.309	37.1242	31.0594	37.0032	36.1092	32.4653	34.749	28.4285	30.3617	32.0787	31.8324	32.0216	31.3417	39.1377	34.2613	28.4541	30.1901	27.7923	22.6997	21.2947

## Sheet: Gene_Functions
Gene	Function
VCAM1	Cell Adhesion
ICAM1	Cell Adhesion
ICAM2	Cell Adhesion
MADCAM1	Cell Adhesion
EMCN	Cell Adhesion
SELP	Cell Adhesion
SELE	Cell Adhesion
NOS3	Cell Stress
HMOX1	Cell Stress
VWF	Endothelial Cell Markers
SLC2A1	Endothelial Cell Markers
TIE1	Endothelial Cell Markers
TEK	Endothelial Cell Markers
PECAM	Endothelial Cell Markers
Nostrin	Endothelial Cell Markers
TJP1	Junction Markers
CLDN5	Junction Markers
OCLN	Junction Markers
CDH5	Junction Markers
GJA1	Junction Markers
ESAM	Junction Markers
ALDH1L1	Astrocyte Marker
ITGAM	Microglia Marker
ACTA2	Smooth Muscle Cell Marker
APOE	Plasmin/APOE Pathways
LRP1	Plasmin/APOE Pathways
Plau	Plasmin/APOE Pathways
PLAT	Plasmin/APOE Pathways
SERPINE1	Senescence-Associated
CDKN1A	Senescence-Associated
CDKN2A	Senescence-Associated
CXCL1	Senescence-Associated
CXCL2	Senescence-Associated
IL6	Senescence-Associated
CXCL8	Senescence-Associated
CSF2	Senescence-Associated
VEGFA	VEGF/Notch Pathways
KDR	VEGF/Notch Pathways
FLT1	VEGF/Notch Pathways
ENG	VEGF/Notch Pathways
ADGRL4	VEGF/Notch Pathways
DLL4	VEGF/Notch Pathways

## Sheet: BloodVessel_TotalCortex
Sample ID	ABC-Braak	RNA Source	Gene	DeltaCT
AD01	1	Total Cortex	PECAM	6.31876
AD01	1	Blood Vessel	PECAM	1.83409
AD01	1	Total Cortex	ACTA2	3.56451
AD01	1	Blood Vessel	ACTA2	1.13266
AD01	1	Total Cortex	ALDH1L1	4.24241
AD01	1	Blood Vessel	ALDH1L1	5.73994
AD01	1	Total Cortex	ITGAM	7.59257
AD01	1	Blood Vessel	ITGAM	6.67383
AD02	1	Total Cortex	PECAM	4.84747
AD02	1	Blood Vessel	PECAM	3.18196
AD02	1	Total Cortex	ACTA2	4.56338
AD02	1	Blood Vessel	ACTA2	2.83018
AD02	1	Total Cortex	ALDH1L1	3.47271
AD02	1	Blood Vessel	ALDH1L1	5.71587
AD02	1	Total Cortex	ITGAM	5.67855
AD02	1	Blood Vessel	ITGAM	7.40823
AD03	1	Total Cortex	PECAM	5.89324
AD03	1	Blood Vessel	PECAM	2.87498
AD03	1	Total Cortex	ACTA2	4.64403
AD03	1	Blood Vessel	ACTA2	2.38469
AD03	1	Total Cortex	ALDH1L1	6.66782
AD03	1	Blood Vessel	ALDH1L1	5.63667
AD03	1	Total Cortex	ITGAM	-0.202602
AD03	1	Blood Vessel	ITGAM	5.96235
AD04	1	Total Cortex	PECAM	7.89079
AD04	1	Blood Vessel	PECAM	3.73092
AD04	1	Total Cortex	ACTA2	5.33296
AD04	1	Blood Vessel	ACTA2	3.17446
AD04	1	Total Cortex	ALDH1L1	2.45593
AD04	1	Blood Vessel	ALDH1L1	4.56623
AD04	1	Total Cortex	ITGAM	7.78604
AD04	1	Blood Vessel	ITGAM	6.45863
AD05	1	Total Cortex	PECAM	6.99495
AD05	1	Blood Vessel	PECAM	4.44225
AD05	1	Total Cortex	ACTA2	4.3809
AD05	1	Blood Vessel	ACTA2	1.68427
AD05	1	Total Cortex	ALDH1L1	2.79461
AD05	1	Blood Vessel	ALDH1L1	4.39156
AD05	1	Total Cortex	ITGAM	7.39617
AD05	1	Blood Vessel	ITGAM	5.90017
AD06	1	Total Cortex	PECAM	4.79275
AD06	1	Blood Vessel	PECAM	2.77973
AD06	1	Total Cortex	ACTA2	4.07986
AD06	1	Blood Vessel	ACTA2	4.26073
AD06	1	Total Cortex	ALDH1L1	3.83771
AD06	1	Blood Vessel	ALDH1L1	8.87723
AD06	1	Total Cortex	ITGAM	5.86159
AD06	1	Blood Vessel	ITGAM	8.35081
AD08	1	Total Cortex	PECAM	3.55286
AD08	1	Blood Vessel	PECAM	1.68744
AD08	1	Total Cortex	ACTA2	1.73098
AD08	1	Blood Vessel	ACTA2	1.43498
AD08	1	Total Cortex	ALDH1L1	3.13262
AD08	1	Blood Vessel	ALDH1L1	6.47019
AD08	1	Total Cortex	ITGAM	6.19494
AD08	1	Blood Vessel	ITGAM	6.61475
AD12	1	Total Cortex	PECAM	1.10674
AD12	1	Blood Vessel	PECAM	3.68762
AD12	1	Total Cortex	ACTA2	4.019
AD12	1	Blood Vessel	ACTA2	0.775773
AD12	1	Total Cortex	ALDH1L1	4.97596
AD12	1	Blood Vessel	ALDH1L1	4.56194
AD12	1	Total Cortex	ITGAM	2.52958
AD12	1	Blood Vessel	ITGAM	NA
CTRL01	3	Total Cortex	PECAM	5.56267
CTRL01	3	Blood Vessel	PECAM	2.32234
CTRL01	3	Total Cortex	ACTA2	4.12528
CTRL01	3	Blood Vessel	ACTA2	3.82371
CTRL01	3	Total Cortex	ALDH1L1	3.32051
CTRL01	3	Blood Vessel	ALDH1L1	5.87104
CTRL01	3	Total Cortex	ITGAM	5.86562
CTRL01	3	Blood Vessel	ITGAM	6.36463
CTRL03	3	Total Cortex	PECAM	5.43203
CTRL03	3	Blood Vessel	PECAM	1.23677
CTRL03	3	Total Cortex	ACTA2	2.59131
CTRL03	3	Blood Vessel	ACTA2	0.84361
CTRL03	3	Total Cortex	ALDH1L1	3.08264
CTRL03	3	Blood Vessel	ALDH1L1	6.77815
CTRL03	3	Total Cortex	ITGAM	6.37634
CTRL03	3	Blood Vessel	ITGAM	5.48245
CTRL04	3	Total Cortex	PECAM	7.21831
CTRL04	3	Blood Vessel	PECAM	1.81072
CTRL04	3	Total Cortex	ACTA2	4.79777
CTRL04	3	Blood Vessel	ACTA2	1.00981
CTRL04	3	Total Cortex	ALDH1L1	5.73941
CTRL04	3	Blood Vessel	ALDH1L1	8.29931
CTRL04	3	Total Cortex	ITGAM	7.77443
CTRL04	3	Blood Vessel	ITGAM	8.49708
CTRL05	3	Total Cortex	PECAM	5.46834
CTRL05	3	Blood Vessel	PECAM	3.11143
CTRL05	3	Total Cortex	ACTA2	3.6729
CTRL05	3	Blood Vessel	ACTA2	0.91744
CTRL05	3	Total Cortex	ALDH1L1	2.98379
CTRL05	3	Blood Vessel	ALDH1L1	7.44013
CTRL05	3	Total Cortex	ITGAM	5.30932
CTRL05	3	Blood Vessel	ITGAM	5.85731
CTRL07	3	Total Cortex	PECAM	6.82299
CTRL07	3	Blood Vessel	PECAM	4.91842
CTRL07	3	Total Cortex	ACTA2	2.90556
CTRL07	3	Blood Vessel	ACTA2	3.32274
CTRL07	3	Total Cortex	ALDH1L1	3.51281
CTRL07	3	Blood Vessel	ALDH1L1	6.75772
CTRL07	3	Total Cortex	ITGAM	6.31305
CTRL07	3	Blood Vessel	ITGAM	7.2236
CTRL08	3	Total Cortex	PECAM	6.83356
CTRL08	3	Blood Vessel	PECAM	2.80946
CTRL08	3	Total Cortex	ACTA2	4.54241
CTRL08	3	Blood Vessel	ACTA2	1.3521
CTRL08	3	Total Cortex	ALDH1L1	3.67333
CTRL08	3	Blood Vessel	ALDH1L1	4.81682
CTRL08	3	Total Cortex	ITGAM	6.89114
CTRL08	3	Blood Vessel	ITGAM	7.16329
CTRL10	3	Total Cortex	PECAM	6.56719
CTRL10	3	Blood Vessel	PECAM	2.97687
CTRL10	3	Total Cortex	ACTA2	1.32679
CTRL10	3	Blood Vessel	ACTA2	2.51708
CTRL10	3	Total Cortex	ALDH1L1	2.87379
CTRL10	3	Blood Vessel	ALDH1L1	6.95555
CTRL10	3	Total Cortex	ITGAM	7.02384
CTRL10	3	Blood Vessel	ITGAM	7.80104
CTRL11	3	Total Cortex	PECAM	7.00445
CTRL11	3	Blood Vessel	PECAM	1.9467
CTRL11	3	Total Cortex	ACTA2	5.05173
CTRL11	3	Blood Vessel	ACTA2	0.535117
CTRL11	3	Total Cortex	ALDH1L1	5.0761
CTRL11	3	Blood Vessel	ALDH1L1	5.83531
CTRL11	3	Total Cortex	ITGAM	7.17069
CTRL11	3	Blood Vessel	ITGAM	7.29928

## Sheet: Olink_NPX_Data
Sample ID	Plasma Time Point	Protein	NPX
AD07	1	CDH5	5.0194
AD07	2	CDH5	5.52701
AD07	3	CDH5	4.6774
AD08	1	CDH5	4.64988
AD08	2	CDH5	4.79059
AD08	3	CDH5	5.11617
AD09	1	CDH5	5.16008
AD09	2	CDH5	5.47207
AD09	3	CDH5	5.88801
AD10	1	CDH5	4.70479
AD10	2	CDH5	4.89825
AD10	3	CDH5	5.11049
AD11	1	CDH5	4.69606
AD11	2	CDH5	4.80833
AD11	3	CDH5	4.71552
AD13	1	CDH5	4.88686
AD13	2	CDH5	4.96951
AD13	3	CDH5	5.13827
AD14	1	CDH5	4.93711
AD14	2	CDH5	4.84658
AD14	3	CDH5	5.00682
AD15	1	CDH5	5.49844
AD15	2	CDH5	5.78285
AD15	3	CDH5	5.77247
AD16	1	CDH5	5.0582
AD16	2	CDH5	5.20918
AD16	3	CDH5	5.72322
CTRL02	1	CDH5	5.59274
CTRL02	2	CDH5	5.66808
CTRL02	3	CDH5	5.69339
CTRL06	1	CDH5	5.34813
CTRL06	2	CDH5	5.53879
CTRL09	1	CDH5	5.29078
CTRL09	2	CDH5	5.33029
CTRL09	3	CDH5	5.3479
CTRL12	1	CDH5	4.94278
CTRL12	2	CDH5	5.07625
CTRL12	3	CDH5	4.98417
AD07	1	CXCL1	10.0771
AD07	2	CXCL1	9.89197
AD07	3	CXCL1	8.81967
AD08	1	CXCL1	9.80793
AD08	2	CXCL1	10.0322
AD08	3	CXCL1	10.1471
AD09	1	CXCL1	9.95148
AD09	2	CXCL1	10.4487
AD09	3	CXCL1	10.0931
AD10	1	CXCL1	9.80724
AD10	2	CXCL1	10.1251
AD10	3	CXCL1	10.3474
AD11	1	CXCL1	8.39304
AD11	2	CXCL1	9.38131
AD11	3	CXCL1	8.85349
AD13	1	CXCL1	9.68699
AD13	2	CXCL1	9.27517
AD13	3	CXCL1	9.5499
AD14	1	CXCL1	11.0097
AD14	2	CXCL1	10.6603
AD14	3	CXCL1	10.0264
AD15	1	CXCL1	9.79751
AD15	2	CXCL1	8.94802
AD15	3	CXCL1	7.39063
AD16	1	CXCL1	10.1167
AD16	2	CXCL1	9.79557
AD16	3	CXCL1	10.1829
CTRL02	1	CXCL1	9.25
CTRL02	2	CXCL1	10.5077
CTRL02	3	CXCL1	9.75427
CTRL06	1	CXCL1	8.97489
CTRL06	2	CXCL1	9.80654
CTRL09	1	CXCL1	9.95961
CTRL09	2	CXCL1	10.5071
CTRL09	3	CXCL1	10.6523
CTRL12	1	CXCL1	8.41421
CTRL12	2	CXCL1	7.34466
CTRL12	3	CXCL1	8.68605
AD07	1	ENG	3.41647
AD07	2	ENG	3.38755
AD07	3	ENG	3.01267
AD08	1	ENG	2.97944
AD08	2	ENG	3.08977
AD08	3	ENG	3.32918
AD09	1	ENG	3.45586
AD09	2	ENG	3.5003
AD09	3	ENG	3.62896
AD10	1	ENG	2.9827
AD10	2	ENG	2.75899
AD10	3	ENG	3.00941
AD11	1	ENG	3.16457
AD11	2	ENG	3.27505
AD11	3	ENG	2.65123
AD13	1	ENG	2.69541
AD13	2	ENG	3.00917
AD13	3	ENG	2.98365
AD14	1	ENG	3.25605
AD14	2	ENG	3.3094
AD14	3	ENG	3.16376
AD15	1	ENG	3.35198
AD15	2	ENG	3.0755
AD15	3	ENG	3.33004
AD16	1	ENG	3.25655
AD16	2	ENG	3.41469
AD16	3	ENG	3.61904
CTRL02	1	ENG	3.24363
CTRL02	2	ENG	3.46806
CTRL02	3	ENG	3.42323
CTRL06	1	ENG	3.19292
CTRL06	2	ENG	3.30453
CTRL09	1	ENG	3.10854
CTRL09	2	ENG	3.05041
CTRL09	3	ENG	3.12445
CTRL12	1	ENG	3.15319
CTRL12	2	ENG	3.29159
CTRL12	3	ENG	3.47692
AD07	1	HO-1	12.6948
AD07	2	HO-1	12.8007
AD07	3	HO-1	12.6666
AD08	1	HO-1	12.5086
AD08	2	HO-1	12.8221
AD08	3	HO-1	12.7997
AD09	1	HO-1	12.5574
AD09	2	HO-1	12.6586
AD09	3	HO-1	12.8402
AD10	1	HO-1	12.1756
AD10	2	HO-1	12.4246
AD10	3	HO-1	12.1298
AD11	1	HO-1	12.1569
AD11	2	HO-1	12.2616
AD11	3	HO-1	12.2617
AD13	1	HO-1	12.9837
AD13	2	HO-1	12.8498
AD13	3	HO-1	13.0283
AD14	1	HO-1	12.8491
AD14	2	HO-1	12.8316
AD14	3	HO-1	12.7428
AD15	1	HO-1	13.1609
AD15	2	HO-1	13.1304
AD15	3	HO-1	12.9788
AD16	1	HO-1	13.0178
AD16	2	HO-1	13.0047
AD16	3	HO-1	13.2254
CTRL02	1	HO-1	12.8768
CTRL02	2	HO-1	12.9237
CTRL02	3	HO-1	12.9283
CTRL06	1	HO-1	13.0874
CTRL06	2	HO-1	12.9409
CTRL09	1	HO-1	13.0422
CTRL09	2	HO-1	12.8209
CTRL09	3	HO-1	12.9136
CTRL12	1	HO-1	12.9433
CTRL12	2	HO-1	12.9609
CTRL12	3	HO-1	12.4546
AD07	1	ICAM-2	5.95982
AD07	2	ICAM-2	6.31905
AD07	3	ICAM-2	5.8291
AD08	1	ICAM-2	6.25031
AD08	2	ICAM-2	6.41444
AD08	3	ICAM-2	6.75194
AD09	1	ICAM-2	6.29544
AD09	2	ICAM-2	6.90308
AD09	3	ICAM-2	7.34445
AD10	1	ICAM-2	5.97394
AD10	2	ICAM-2	6.0234
AD10	3	ICAM-2	6.15643
AD11	1	ICAM-2	6.29368
AD11	2	ICAM-2	6.36601
AD11	3	ICAM-2	6.09477
AD13	1	ICAM-2	5.28755
AD13	2	ICAM-2	5.37327
AD13	3	ICAM-2	5.49703
AD14	1	ICAM-2	6.0898
AD14	2	ICAM-2	6.00391
AD14	3	ICAM-2	6.11707
AD15	1	ICAM-2	6.40675
AD15	2	ICAM-2	6.57921
AD15	3	ICAM-2	6.63615
AD16	1	ICAM-2	6.23303
AD16	2	ICAM-2	6.34757
AD16	3	ICAM-2	6.74404
CTRL02	1	ICAM-2	5.59685
CTRL02	2	ICAM-2	5.78784
CTRL02	3	ICAM-2	5.76855
CTRL06	1	ICAM-2	5.89699
CTRL06	2	ICAM-2	6.0426
CTRL09	1	ICAM-2	5.8762
CTRL09	2	ICAM-2	5.91089
CTRL09	3	ICAM-2	6.34444
CTRL12	1	ICAM-2	5.64482
CTRL12	2	ICAM-2	5.7536
CTRL12	3	ICAM-2	5.89721
AD07	1	ICAM1	6.67588
AD07	2	ICAM1	6.89343
AD07	3	ICAM1	6.6471
AD08	1	ICAM1	6.79193
AD08	2	ICAM1	7.06552
AD08	3	ICAM1	7.45191
AD09	1	ICAM1	7.54874
AD09	2	ICAM1	7.55943
AD09	3	ICAM1	7.70869
AD10	1	ICAM1	6.83582
AD10	2	ICAM1	6.60287
AD10	3	ICAM1	7.00061
AD11	1	ICAM1	6.88217
AD11	2	ICAM1	6.75409
AD11	3	ICAM1	6.3697
AD13	1	ICAM1	6.72707
AD13	2	ICAM1	6.6407
AD13	3	ICAM1	6.50155
AD14	1	ICAM1	7.10517
AD14	2	ICAM1	6.73396
AD14	3	ICAM1	6.74549
AD15	1	ICAM1	6.80578
AD15	2	ICAM1	6.77457
AD15	3	ICAM1	7.033
AD16	1	ICAM1	6.87432
AD16	2	ICAM1	7.18963
AD16	3	ICAM1	7.35613
CTRL02	1	ICAM1	7.08849
CTRL02	2	ICAM1	7.41856
CTRL02	3	ICAM1	7.43589
CTRL06	1	ICAM1	6.80282
CTRL06	2	ICAM1	7.16856
CTRL09	1	ICAM1	6.35881
CTRL09	2	ICAM1	6.35007
CTRL09	3	ICAM1	6.79971
CTRL12	1	ICAM1	6.84749
CTRL12	2	ICAM1	6.99007
CTRL12	3	ICAM1	6.91728
AD07	1	IL6	3.16449
AD07	2	IL6	3.36394
AD07	3	IL6	7.56257
AD08	1	IL6	4.22394
AD08	2	IL6	4.43955
AD08	3	IL6	4.8904
AD09	1	IL6	4.02302
AD09	2	IL6	4.39143
AD09	3	IL6	6.15237
AD10	1	IL6	4.11585
AD10	2	IL6	4.54221
AD10	3	IL6	4.89739
AD11	1	IL6	7.07248
AD11	2	IL6	7.58093
AD11	3	IL6	6.60332
AD13	1	IL6	3.55158
AD13	2	IL6	3.25209
AD13	3	IL6	3.73952
AD14	1	IL6	4.06143
AD14	2	IL6	5.64754
AD14	3	IL6	4.24516
AD15	1	IL6	4.50564
AD15	2	IL6	3.60526
AD15	3	IL6	3.84417
AD16	1	IL6	3.91231
AD16	2	IL6	4.35585
AD16	3	IL6	4.6102
CTRL02	1	IL6	4.25655
CTRL02	2	IL6	4.74422
CTRL02	3	IL6	3.83936
CTRL06	1	IL6	4.14773
CTRL06	2	IL6	6.00993
CTRL09	1	IL6	4.06511
CTRL09	2	IL6	6.13844
CTRL09	3	IL6	7.52256
CTRL12	1	IL6	4.1627
CTRL12	2	IL6	3.35626
CTRL12	3	IL6	3.21365
AD07	1	IL8	5.2611
AD07	2	IL8	5.54779
AD07	3	IL8	6.26553
AD08	1	IL8	5.58457
AD08	2	IL8	5.99099
AD08	3	IL8	6.18645
AD09	1	IL8	5.64148
AD09	2	IL8	5.75016
AD09	3	IL8	5.84779
AD10	1	IL8	5.09246
AD10	2	IL8	5.18179
AD10	3	IL8	5.64379
AD11	1	IL8	5.34215
AD11	2	IL8	5.67327
AD11	3	IL8	5.00707
AD13	1	IL8	5.53673
AD13	2	IL8	5.20101
AD13	3	IL8	5.08427
AD14	1	IL8	5.98332
AD14	2	IL8	5.87425
AD14	3	IL8	6.03772
AD15	1	IL8	5.32411
AD15	2	IL8	5.44563
AD15	3	IL8	5.91526
AD16	1	IL8	5.32394
AD16	2	IL8	4.8708
AD16	3	IL8	5.17859
CTRL02	1	IL8	5.02453
CTRL02	2	IL8	5.69463
CTRL02	3	IL8	5.00338
CTRL06	1	IL8	5.86119
CTRL06	2	IL8	6.26708
CTRL09	1	IL8	5.59668
CTRL09	2	IL8	5.62588
CTRL09	3	IL8	6.84125
CTRL12	1	IL8	4.53903
CTRL12	2	IL8	5.29538
CTRL12	3	IL8	4.08762
AD07	1	ITGAM	1.95134
AD07	2	ITGAM	1.6233
AD07	3	ITGAM	1.6969
AD08	1	ITGAM	2.33101
AD08	2	ITGAM	2.44449
AD08	3	ITGAM	2.31339
AD09	1	ITGAM	2.17538
AD09	2	ITGAM	2.28484
AD09	3	ITGAM	1.90599
AD10	1	ITGAM	1.93832
AD10	2	ITGAM	1.7444
AD10	3	ITGAM	1.82859
AD11	1	ITGAM	2.22293
AD11	2	ITGAM	1.66482
AD11	3	ITGAM	1.31667
AD13	1	ITGAM	2.92177
AD13	2	ITGAM	2.23744
AD13	3	ITGAM	2.70191
AD14	1	ITGAM	2.26356
AD14	2	ITGAM	2.66767
AD14	3	ITGAM	2.56683
AD15	1	ITGAM	2.51053
AD15	2	ITGAM	2.50307
AD15	3	ITGAM	2.30667
AD16	1	ITGAM	2.48963
AD16	2	ITGAM	2.5954
AD16	3	ITGAM	2.42457
CTRL02	1	ITGAM	2.82142
CTRL02	2	ITGAM	2.52991
CTRL02	3	ITGAM	2.62653
CTRL06	1	ITGAM	1.99512
CTRL06	2	ITGAM	2.25722
CTRL09	1	ITGAM	2.34623
CTRL09	2	ITGAM	1.20941
CTRL09	3	ITGAM	2.12405
CTRL12	1	ITGAM	2.35294
CTRL12	2	ITGAM	2.83469
CTRL12	3	ITGAM	2.45779
AD07	1	NOS3	3.03489
AD07	2	NOS3	3.07722
AD07	3	NOS3	2.66118
AD08	1	NOS3	1.6319
AD08	2	NOS3	1.74824
AD08	3	NOS3	2.09456
AD09	1	NOS3	2.35637
AD09	2	NOS3	3.21594
AD09	3	NOS3	3.40864
AD10	1	NOS3	1.98131
AD10	2	NOS3	1.70741
AD10	3	NOS3	2.19619
AD11	1	NOS3	2.50154
AD11	2	NOS3	2.10063
AD11	3	NOS3	2.1156
AD13	1	NOS3	2.41018
AD13	2	NOS3	1.78211
AD13	3	NOS3	1.71118
AD14	1	NOS3	2.46876
AD14	2	NOS3	1.99593
AD14	3	NOS3	1.82666
AD15	1	NOS3	3.22346
AD15	2	NOS3	3.17005
AD15	3	NOS3	2.91754
AD16	1	NOS3	1.52149
AD16	2	NOS3	2.65428
AD16	3	NOS3	2.03727
CTRL02	1	NOS3	2.38139
CTRL02	2	NOS3	2.45955
CTRL02	3	NOS3	2.67763
CTRL06	1	NOS3	1.82321
CTRL06	2	NOS3	2.59859
CTRL09	1	NOS3	2.01766
CTRL09	2	NOS3	2.93339
CTRL09	3	NOS3	1.82281
CTRL12	1	NOS3	1.90432
CTRL12	2	NOS3	1.94637
CTRL12	3	NOS3	2.11992
AD07	1	PAI	6.48755
AD07	2	PAI	6.43926
AD07	3	PAI	5.37727
AD08	1	PAI	7.72157
AD08	2	PAI	7.73931
AD08	3	PAI	7.49015
AD09	1	PAI	6.0369
AD09	2	PAI	7.19054
AD09	3	PAI	7.54149
AD10	1	PAI	5.73423
AD10	2	PAI	6.36656
AD10	3	PAI	6.59991
AD11	1	PAI	5.63654
AD11	2	PAI	6.58736
AD11	3	PAI	5.69913
AD13	1	PAI	5.83721
AD13	2	PAI	4.87404
AD13	3	PAI	5.35329
AD14	1	PAI	6.51073
AD14	2	PAI	6.27684
AD14	3	PAI	7.08099
AD15	1	PAI	6.69833
AD15	2	PAI	6.37562
AD15	3	PAI	7.10325
AD16	1	PAI	6.79451
AD16	2	PAI	4.8361
AD16	3	PAI	6.31714
CTRL02	1	PAI	4.92441
CTRL02	2	PAI	6.81249
CTRL02	3	PAI	6.67261
CTRL06	1	PAI	5.3934
CTRL06	2	PAI	6.55856
CTRL09	1	PAI	5.69883
CTRL09	2	PAI	6.07338
CTRL09	3	PAI	6.44815
CTRL12	1	PAI	5.54857
CTRL12	2	PAI	7.00175
CTRL12	3	PAI	6.06181
AD07	1	PECAM-1	5.57653
AD07	2	PECAM-1	5.78861
AD07	3	PECAM-1	5.01873
AD08	1	PECAM-1	5.49499
AD08	2	PECAM-1	5.74067
AD08	3	PECAM-1	6.00512
AD09	1	PECAM-1	6.344
AD09	2	PECAM-1	6.72666
AD09	3	PECAM-1	7.5512
AD10	1	PECAM-1	5.70272
AD10	2	PECAM-1	6.11959
AD10	3	PECAM-1	6.49128
AD11	1	PECAM-1	5.19076
AD11	2	PECAM-1	6.1308
AD11	3	PECAM-1	5.23092
AD13	1	PECAM-1	5.27183
AD13	2	PECAM-1	5.31209
AD13	3	PECAM-1	5.70951
AD14	1	PECAM-1	5.71935
AD14	2	PECAM-1	5.16367
AD14	3	PECAM-1	5.45459
AD15	1	PECAM-1	5.70832
AD15	2	PECAM-1	5.53935
AD15	3	PECAM-1	4.90041
AD16	1	PECAM-1	5.53094
AD16	2	PECAM-1	5.66019
AD16	3	PECAM-1	6.15334
CTRL02	1	PECAM-1	5.73255
CTRL02	2	PECAM-1	7.48206
CTRL02	3	PECAM-1	6.55487
CTRL06	1	PECAM-1	5.84629
CTRL06	2	PECAM-1	6.63341
CTRL09	1	PECAM-1	5.83507
CTRL09	2	PECAM-1	5.82739
CTRL09	3	PECAM-1	5.977
CTRL12	1	PECAM-1	5.37566
CTRL12	2	PECAM-1	4.83189
CTRL12	3	PECAM-1	5.32887
AD07	1	SELE	11.9224
AD07	2	SELE	12.1286
AD07	3	SELE	11.9829
AD08	1	SELE	12.9369
AD08	2	SELE	13.449
AD08	3	SELE	13.4298
AD09	1	SELE	12.8213
AD09	2	SELE	13.3084
AD09	3	SELE	13.5796
AD10	1	SELE	12.0527
AD10	2	SELE	12.3568
AD10	3	SELE	12.3437
AD11	1	SELE	12.3495
AD11	2	SELE	12.4917
AD11	3	SELE	12.4748
AD13	1	SELE	11.5986
AD13	2	SELE	11.3671
AD13	3	SELE	11.4896
AD14	1	SELE	12.388
AD14	2	SELE	12.3348
AD14	3	SELE	12.6473
AD15	1	SELE	12.4001
AD15	2	SELE	12.5876
AD15	3	SELE	12.8083
AD16	1	SELE	11.5573
AD16	2	SELE	11.6763
AD16	3	SELE	12.1936
CTRL02	1	SELE	12.8738
CTRL02	2	SELE	12.9999
CTRL02	3	SELE	12.8934
CTRL06	1	SELE	12.3247
CTRL06	2	SELE	12.6584
CTRL09	1	SELE	12.1192
CTRL09	2	SELE	12.0394
CTRL09	3	SELE	12.8986
CTRL12	1	SELE	12.6694
CTRL12	2	SELE	12.5199
CTRL12	3	SELE	12.4124
AD07	1	SELP	11.0214
AD07	2	SELP	11.0284
AD07	3	SELP	9.81629
AD08	1	SELP	11.5188
AD08	2	SELP	11.8049
AD08	3	SELP	11.5812
AD09	1	SELP	11.105
AD09	2	SELP	11.9494
AD09	3	SELP	12.624
AD10	1	SELP	11.0649
AD10	2	SELP	11.8064
AD10	3	SELP	12.0901
AD11	1	SELP	10.0363
AD11	2	SELP	11.2293
AD11	3	SELP	10.3158
AD13	1	SELP	9.85542
AD13	2	SELP	9.67463
AD13	3	SELP	10.2147
AD14	1	SELP	11.3819
AD14	2	SELP	10.9494
AD14	3	SELP	11.2806
AD15	1	SELP	10.9982
AD15	2	SELP	10.7003
AD15	3	SELP	10.768
AD16	1	SELP	11.4802
AD16	2	SELP	11.1039
AD16	3	SELP	11.7363
CTRL02	1	SELP	10.18
CTRL02	2	SELP	12.4074
CTRL02	3	SELP	11.1578
CTRL06	1	SELP	10.8121
CTRL06	2	SELP	11.7674
CTRL09	1	SELP	10.9473
CTRL09	2	SELP	10.972
CTRL09	3	SELP	11.4381
CTRL12	1	SELP	10.5046
CTRL12	2	SELP	10.5182
CTRL12	3	SELP	10.614
AD07	1	t-PA	7.16952
AD07	2	t-PA	7.54974
AD07	3	t-PA	6.66864
AD08	1	t-PA	7.50231
AD08	2	t-PA	7.49249
AD08	3	t-PA	7.57843
AD09	1	t-PA	7.58703
AD09	2	t-PA	8.67174
AD09	3	t-PA	9.13205
AD10	1	t-PA	6.35181
AD10	2	t-PA	6.35625
AD10	3	t-PA	6.53035
AD11	1	t-PA	7.44898
AD11	2	t-PA	7.82983
AD11	3	t-PA	7.41025
AD13	1	t-PA	6.50529
AD13	2	t-PA	6.64741
AD13	3	t-PA	7.16028
AD14	1	t-PA	6.66959
AD14	2	t-PA	6.73192
AD14	3	t-PA	6.92377
AD15	1	t-PA	6.92632
AD15	2	t-PA	7.28694
AD15	3	t-PA	6.03126
AD16	1	t-PA	6.34574
AD16	2	t-PA	7.13043
AD16	3	t-PA	7.08812
CTRL02	1	t-PA	6.78153
CTRL02	2	t-PA	7.32812
CTRL02	3	t-PA	7.5438
CTRL06	1	t-PA	7.0621
CTRL06	2	t-PA	7.59317
CTRL09	1	t-PA	7.54846
CTRL09	2	t-PA	7.73992
CTRL09	3	t-PA	7.79939
CTRL12	1	t-PA	7.12868
CTRL12	2	t-PA	5.28284
CTRL12	3	t-PA	7.14105
AD07	1	TIE1	2.18067
AD07	2	TIE1	2.2019
AD07	3	TIE1	1.98658
AD08	1	TIE1	1.81866
AD08	2	TIE1	1.99309
AD08	3	TIE1	2.23001
AD09	1	TIE1	2.30373
AD09	2	TIE1	2.41027
AD09	3	TIE1	2.58566
AD10	1	TIE1	1.85949
AD10	2	TIE1	1.78335
AD10	3	TIE1	1.963
AD11	1	TIE1	1.76944
AD11	2	TIE1	1.82379
AD11	3	TIE1	1.56045
AD13	1	TIE1	1.88492
AD13	2	TIE1	1.86232
AD13	3	TIE1	1.8518
AD14	1	TIE1	1.93579
AD14	2	TIE1	1.85939
AD14	3	TIE1	1.89073
AD15	1	TIE1	2.30751
AD15	2	TIE1	2.36154
AD15	3	TIE1	2.46461
AD16	1	TIE1	2.32551
AD16	2	TIE1	2.74307
AD16	3	TIE1	2.67149
CTRL02	1	TIE1	2.13364
CTRL02	2	TIE1	2.26718
CTRL02	3	TIE1	2.34242
CTRL06	1	TIE1	1.84758
CTRL06	2	TIE1	1.83686
CTRL09	1	TIE1	2.02787
CTRL09	2	TIE1	2.08269
CTRL09	3	TIE1	2.25452
CTRL12	1	TIE1	1.9841
CTRL12	2	TIE1	2.06387
CTRL12	3	TIE1	1.94858
AD07	1	TIE2	8.87492
AD07	2	TIE2	9.18213
AD07	3	TIE2	8.76982
AD08	1	TIE2	8.92073
AD08	2	TIE2	9.17562
AD08	3	TIE2	9.2087
AD09	1	TIE2	8.53994
AD09	2	TIE2	8.80056
AD09	3	TIE2	8.87175
AD10	1	TIE2	8.53612
AD10	2	TIE2	8.51991
AD10	3	TIE2	8.91543
AD11	1	TIE2	8.41674
AD11	2	TIE2	8.59034
AD11	3	TIE2	8.35937
AD13	1	TIE2	8.65785
AD13	2	TIE2	8.55773
AD13	3	TIE2	8.60438
AD14	1	TIE2	8.59842
AD14	2	TIE2	8.61326
AD14	3	TIE2	8.75117
AD15	1	TIE2	9.00226
AD15	2	TIE2	9.03158
AD15	3	TIE2	9.00135
AD16	1	TIE2	8.77292
AD16	2	TIE2	8.61681
AD16	3	TIE2	9.18091
CTRL02	1	TIE2	8.66443
CTRL02	2	TIE2	8.77968
CTRL02	3	TIE2	8.68648
CTRL06	1	TIE2	8.66809
CTRL06	2	TIE2	8.56763
CTRL09	1	TIE2	8.85125
CTRL09	2	TIE2	8.90326
CTRL09	3	TIE2	9.01895
CTRL12	1	TIE2	8.65404
CTRL12	2	TIE2	8.9864
CTRL12	3	TIE2	8.6246
AD07	1	uPA	10.4175
AD07	2	uPA	10.5355
AD07	3	uPA	10.2838
AD08	1	uPA	10.2712
AD08	2	uPA	10.7056
AD08	3	uPA	10.8715
AD09	1	uPA	10.632
AD09	2	uPA	10.8164
AD09	3	uPA	11.1483
AD10	1	uPA	10.1656
AD10	2	uPA	9.95072
AD10	3	uPA	10.4541
AD11	1	uPA	10.4939
AD11	2	uPA	10.7577
AD11	3	uPA	10.1751
AD13	1	uPA	10.7247
AD13	2	uPA	10.761
AD13	3	uPA	10.6084
AD14	1	uPA	10.821
AD14	2	uPA	10.556
AD14	3	uPA	10.5211
AD15	1	uPA	10.8163
AD15	2	uPA	10.788
AD15	3	uPA	10.6638
AD16	1	uPA	10.3668
AD16	2	uPA	10.459
AD16	3	uPA	10.7162
CTRL02	1	uPA	10.6393
CTRL02	2	uPA	10.6546
CTRL02	3	uPA	10.7049
CTRL06	1	uPA	10.6204
CTRL06	2	uPA	10.7331
CTRL09	1	uPA	10.6856
CTRL09	2	uPA	10.736
CTRL09	3	uPA	10.558
CTRL12	1	uPA	10.4706
CTRL12	2	uPA	10.3603
CTRL12	3	uPA	10.4088
AD07	1	VCAM1	5.95337
AD07	2	VCAM1	6.08538
AD07	3	VCAM1	6.19038
AD08	1	VCAM1	5.3052
AD08	2	VCAM1	5.46073
AD08	3	VCAM1	6.14535
AD09	1	VCAM1	6.14468
AD09	2	VCAM1	6.14218
AD09	3	VCAM1	6.25812
AD10	1	VCAM1	5.40305
AD10	2	VCAM1	5.30054
AD10	3	VCAM1	5.52846
AD11	1	VCAM1	5.66862
AD11	2	VCAM1	5.67197
AD11	3	VCAM1	5.50608
AD13	1	VCAM1	5.41962
AD13	2	VCAM1	5.70861
AD13	3	VCAM1	5.61013
AD14	1	VCAM1	5.75945
AD14	2	VCAM1	5.56244
AD14	3	VCAM1	5.70796
AD15	1	VCAM1	5.72005
AD15	2	VCAM1	5.81682
AD15	3	VCAM1	5.87031
AD16	1	VCAM1	5.81723
AD16	2	VCAM1	6.0885
AD16	3	VCAM1	6.04621
CTRL02	1	VCAM1	6.03238
CTRL02	2	VCAM1	6.27098
CTRL02	3	VCAM1	6.02997
CTRL06	1	VCAM1	5.8027
CTRL06	2	VCAM1	6.07894
CTRL09	1	VCAM1	5.76864
CTRL09	2	VCAM1	5.7848
CTRL09	3	VCAM1	6.19926
CTRL12	1	VCAM1	5.73098
CTRL12	2	VCAM1	5.83662
CTRL12	3	VCAM1	5.79762
AD07	1	VEGFA	10.9158
AD07	2	VEGFA	11.1224
AD07	3	VEGFA	11.3457
AD08	1	VEGFA	11.4901
AD08	2	VEGFA	11.5244
AD08	3	VEGFA	11.5396
AD09	1	VEGFA	11.1655
AD09	2	VEGFA	11.4811
AD09	3	VEGFA	11.9011
AD10	1	VEGFA	10.9304
AD10	2	VEGFA	11.1138
AD10	3	VEGFA	11.6714
AD11	1	VEGFA	11.1608
AD11	2	VEGFA	11.3896
AD11	3	VEGFA	11.194
AD13	1	VEGFA	10.7991
AD13	2	VEGFA	10.7382
AD13	3	VEGFA	10.6744
AD14	1	VEGFA	11.4083
AD14	2	VEGFA	11.3275
AD14	3	VEGFA	11.6765
AD15	1	VEGFA	11.4153
AD15	2	VEGFA	11.139
AD15	3	VEGFA	11.4538
AD16	1	VEGFA	11.326
AD16	2	VEGFA	11.1353
AD16	3	VEGFA	11.4727
CTRL02	1	VEGFA	10.8058
CTRL02	2	VEGFA	10.9322
CTRL02	3	VEGFA	10.9272
CTRL06	1	VEGFA	11.3124
CTRL06	2	VEGFA	11.5213
CTRL09	1	VEGFA	11.4694
CTRL09	2	VEGFA	11.4731
CTRL09	3	VEGFA	12.0882
CTRL12	1	VEGFA	10.8308
CTRL12	2	VEGFA	11.0709
CTRL12	3	VEGFA	10.529
AD07	1	VEGFR-2	7.7143
AD07	2	VEGFR-2	7.92401
AD07	3	VEGFR-2	7.51763
AD08	1	VEGFR-2	8.20599
AD08	2	VEGFR-2	8.28576
AD08	3	VEGFR-2	8.25906
AD09	1	VEGFR-2	7.72204
AD09	2	VEGFR-2	7.91953
AD09	3	VEGFR-2	7.96242
AD10	1	VEGFR-2	7.41062
AD10	2	VEGFR-2	7.43895
AD10	3	VEGFR-2	7.67229
AD11	1	VEGFR-2	7.69427
AD11	2	VEGFR-2	7.77454
AD11	3	VEGFR-2	7.72089
AD13	1	VEGFR-2	7.43136
AD13	2	VEGFR-2	7.25324
AD13	3	VEGFR-2	7.41702
AD14	1	VEGFR-2	7.84314
AD14	2	VEGFR-2	7.82788
AD14	3	VEGFR-2	7.86974
AD15	1	VEGFR-2	7.80461
AD15	2	VEGFR-2	7.80296
AD15	3	VEGFR-2	7.73431
AD16	1	VEGFR-2	7.77583
AD16	2	VEGFR-2	7.61844
AD16	3	VEGFR-2	7.98185
CTRL02	1	VEGFR-2	7.6713
CTRL02	2	VEGFR-2	7.79644
CTRL02	3	VEGFR-2	7.76726
CTRL06	1	VEGFR-2	7.55887
CTRL06	2	VEGFR-2	7.33687
CTRL09	1	VEGFR-2	7.70048
CTRL09	2	VEGFR-2	7.62296
CTRL09	3	VEGFR-2	7.75066
CTRL12	1	VEGFR-2	7.47872
CTRL12	2	VEGFR-2	7.83223
CTRL12	3	VEGFR-2	7.53184
AD07	1	vWF	5.82056
AD07	2	vWF	6.67996
AD07	3	vWF	6.45379
AD08	1	vWF	4.77487
AD08	2	vWF	4.76648
AD08	3	vWF	5.32378
AD09	1	vWF	5.43884
AD09	2	vWF	5.65693
AD09	3	vWF	6.47827
AD10	1	vWF	5.43308
AD10	2	vWF	5.43504
AD10	3	vWF	5.76936
AD11	1	vWF	5.01744
AD11	2	vWF	5.18716
AD11	3	vWF	5.66506
AD13	1	vWF	6.14597
AD13	2	vWF	6.07125
AD13	3	vWF	6.38758
AD14	1	vWF	5.89886
AD14	2	vWF	5.90226
AD14	3	vWF	6.01138
AD15	1	vWF	7.29808
AD15	2	vWF	6.96119
AD15	3	vWF	6.53031
AD16	1	vWF	5.83937
AD16	2	vWF	6.12955
AD16	3	vWF	6.45756
CTRL02	1	vWF	6.20398
CTRL02	2	vWF	6.30041
CTRL02	3	vWF	6.05075
CTRL06	1	vWF	5.77701
CTRL06	2	vWF	5.81569
CTRL09	1	vWF	6.3654
CTRL09	2	vWF	5.86714
CTRL09	3	vWF	6.80816
CTRL12	1	vWF	5.28857
CTRL12	2	vWF	5.64901
CTRL12	3	vWF	5.38053

## Sheet: Olink_Sample_Info
Sample ID	Plasma Time Point	Years Until Death
AD07	1	3.80548
AD07	2	1.48767
AD07	3	0.0931507
AD08	1	2.75068
AD08	2	1.56986
AD08	3	0.219178
AD09	1	5.39726
AD09	2	4.27123
AD09	3	3.00548
AD10	1	5.23562
AD10	2	3.79726
AD10	3	2.56986
AD11	1	6.62466
AD11	2	4.99178
AD11	3	3.7589
AD13	1	7.67123
AD13	2	5.15068
AD13	3	4.32603
AD14	1	7.30959
AD14	2	6.29589
AD14	3	5.12603
AD15	1	5.76712
AD15	2	4.8411
AD15	3	3.71781
AD16	1	8.00274
AD16	2	6.83014
AD16	3	5.77534
CTRL02	1	8.83562
CTRL02	2	7.5726
CTRL02	3	6.47945
CTRL06	1	2.50411
CTRL06	2	1.23836
CTRL09	1	6.85479
CTRL09	2	5.60548
CTRL09	3	4.19178
CTRL12	1	8.84658
CTRL12	2	7.79178
CTRL12	3	6.69041

## Sheet: Olink_LOD
Protein	Olink Assay	NPX LOD
CDH5	Olink CARDIOVASCULAR III(v.6112)	1.58098
CXCL1	Olink INFLAMMATION(v.3021)	1.48284
ENG	Olink CARDIOMETABOLIC(v.3602)	1.06066
HO-1	Olink IMMUNO-ONCOLOGY(v.3101)	4.18446
ICAM1	Olink CARDIOMETABOLIC(v.3602)	1.30255
ICAM-2	Olink CARDIOVASCULAR III(v.6112)	1.72115
IL6	Olink INFLAMMATION(v.3021)	1.40711
IL8	Olink INFLAMMATION(v.3021)	0.34705
ITGAM	Olink CARDIOMETABOLIC(v.3602)	1.50779
NOS3	Olink IMMUNO-ONCOLOGY(v.3101)	0.94415
PAI	Olink CARDIOVASCULAR III(v.6112)	0.5533
PECAM-1	Olink CARDIOVASCULAR III(v.6112)	0.94995
SELE	Olink CARDIOVASCULAR III(v.6112)	3.09803
SELP	Olink CARDIOVASCULAR III(v.6112)	1.51376
TIE1	Olink CARDIOMETABOLIC(v.3602)	0.39188
TIE2	Olink IMMUNO-ONCOLOGY(v.3101)	1.77888
t-PA	Olink CARDIOVASCULAR III(v.6112)	1.65416
uPA	Olink INFLAMMATION(v.3021)	0.98908
VCAM1	Olink CARDIOMETABOLIC(v.3602)	1.04511
VEGFA	Olink INFLAMMATION(v.3021)	1.02722
VEGFR-2	Olink IMMUNO-ONCOLOGY(v.3101)	0.00477
vWF	Olink CARDIOVASCULAR III(v.6112)	1.28109
